# Supplementary material
Source: PubMed Central journal article supplement (PMC4826269)
Supplement: NIHMS773943-supplement-Supplement.pdf [file NIHMS773943-supplement-Supplement.pdf]

# **A Randomized Trial of Lung Sealant versus Medical Therapy for Advanced Emphysema**

## **Online Data Supplement**

Carolyn E. Come, M.D., Mordechai R. Kramer, M.D., Mark T. Dransfield, M.D., Muhanned Abu-Hijleh, M.D., David Berkowitz, M.D., Michela Bezzi, M.D., Surya P. Bhatt, M.D., Michael B. Boyd, M.D., Enrique Cases, M.D., Alexander C. Chen, M.D., Christopher B. Cooper, M.D., Javier Flandes, M.D., Thomas Gildea M.D., Mark Gotfried, M.D., D. Kyle Hogarth, M.D., Kumaran Kolandaivelu, M.D., William Leeds, D.O., Timothy Liesching, M.D., Nathaniel Marchetti, D.O., Charles Marquette, M.D., Richard A. Mularski, M.D., Victor M. Pinto-Plata, M.D., Michael A. Pritchett, D.O., Samaan Rafeq, M.D., Edmundo R. Rubio, M.D., Dirk-Jan Slebos, M.D., Grigoris Stratakos, M.D., Alexander Sy, M.D., Larry W. Tsai, M.D., Momen Wahidi, M.D., John Walsh, M.D., J. Michael Wells, M.D., Patrick E. Whitten, M.D., Roger Yusen, M.D., Javier J. Zulueta, M.D., Gerard J. Criner, M.D., and George R. Washko, M.D.

### **Table of Contents**

Page 2-3: Members of the ASPIRE study research group

Page 4: Methods

Page 5: Results

Separate attachment: ASPIRE study protocol

## **Members of the ASPIRE study research group**

Brigham and Women's Hospital: George Washko, Carolyn Come, Victor Pinto-Plata, Susan McQuaid, Andetta Hunsaker; St. Elizabeth's Medical Center: Samaan Rafeq, Arthur Dea; Lahey Clinic Medical Center: Timothy Liesching, Lei Yuxiu; Washington University School of Medicine: Roger Yusen, Alexander Chen, Brigitte Mittler; Cleveland Clinic: Thomas Gildea, Yvonne Meli; Temple University Hospital: Gerard Criner, Nathaniel Marchetti, Gayle Jones; The Johns Hopkins Hospital: David Feller-Kopman, Karen Oakjones-Burgess; The George Washington University: Morgan Delaney, Beverly Bentley; Jamaica Hospital Medical Center: Craig Thurm, Kelly Cervellione; Yale University: Gaetane Michaud, Christina Carbone; Carilion Roanoke Memorial Hospital: Edmundo Rubio, Michael Boyd, Casey Benson; Wake Forest University Baptist Medical Center: Alexander Sy, Christina Bellinger, Lisa Williams; Duke University Medical Center: Momen Wahidi, Emily Smathers; Pinehurst Medical Center: Michael Pritchett, Jo Ann McSorely; The University of Alabama at Birmingham: Mark Dransfield, Surya Bhatt, J. Michael Wells, Patti Smith; UT Southwestern Medical Center – Dallas: Muhanned Abu-Hijleh, David Hamilton; Miami VA Healthcare System: Michael Campos, Kilaun Thompson; Emory University Hospital: David Berkowitz, Brittany Jones; University of South Carolina: Franklin McGuire; Mayo Clinic: James Utz, Kathleen Mieras; The University of Chicago Medicine: Kyle Hogarth, Carley Demchuck; Illinois Lung Institute: Patrick Whitten, Ashley Scott; University of Iowa Hospitals and Clinics: Kimberly Baker, Kim Sprenger; Veritas Clinical Specialties: William Leeds, Susie Roeder; National Jewish Health: Ali Musani, Jami Henriksen; The Center for Health Research, Kaiser Permanente Northwest: Richard Mularski, Heather Houston; David Geffen School of Medicine at UCLA: Christopher Cooper, Milan Patel; Pulmonary Associates: Mark Gotfried, J. Burr Ross, Liyi Fu; Cedars-Sinai Medical Center: Zab

Mosenifar, Donato Kusuanco; University of Utah: Chakravarthy Reddy, Judy Jensen; South Nassau Hospital: Louis Saffran, Jean Farrell; Presence St. Joseph Medical Center: John Walsh, Laura Paganessi; Hôpital Pasteur Centre Hospitalier Universitaire de Nice: Charles Marquette, Jennifer Griffonnet; Centre Hospitalier Universitaire de Reims – Hôpital Maison Blanche: Gaetan Deslee, Margaux Verdier; CHU Grenoble: Christophe Pison, Marie Jondot; University of Athens “Sotiria” General Hospital: Grigoris Stratakos, Philip Emmanouil; Rabin Medical Center Beilinson: Mordechai Kramer, Liora Yehoshua; Azienda Ospedaliera Spedali Civili Brescia: Michela Bezzi, Mauro Novali, Angiola Crovace; Clinica Universidad de Navarra: Javier Zulueta, Maria Mar Ocon; Hospital Universitario y Politécnico La Fe: Enrique Cases; Hospital Universitari de Bellvitge: Antoni Rosell, Montserrat Navarro Rodriguez; Fundacion Jimenez Diaz Hospital: Javier Flandes, Iker Fernández-Navamuel, Alejandro Martin; University Medical Center Groningen: Dirk-Jan Slebos, Karin Klooster.

## **Methods**

### *Procedure – treatment delivery*

Emphysematous Lung Sealant Therapy was delivered as follows: the bronchoscope was passed into wedge position at a target site and the treatment catheter was positioned 2-4 cm beyond the end of the bronchoscope under direct visualization; sealant components (5mL) and air (15mL) were mixed to generate 20mL of liquid foam, which was rapidly injected through the catheter while maintaining wedge position; immediately post injection, 30mL of air was delivered to advance the foam peripherally; the bronchoscope was left in wedge position for one minute while the sealant polymerized. The procedure was repeated until all target sites were treated.

## Results

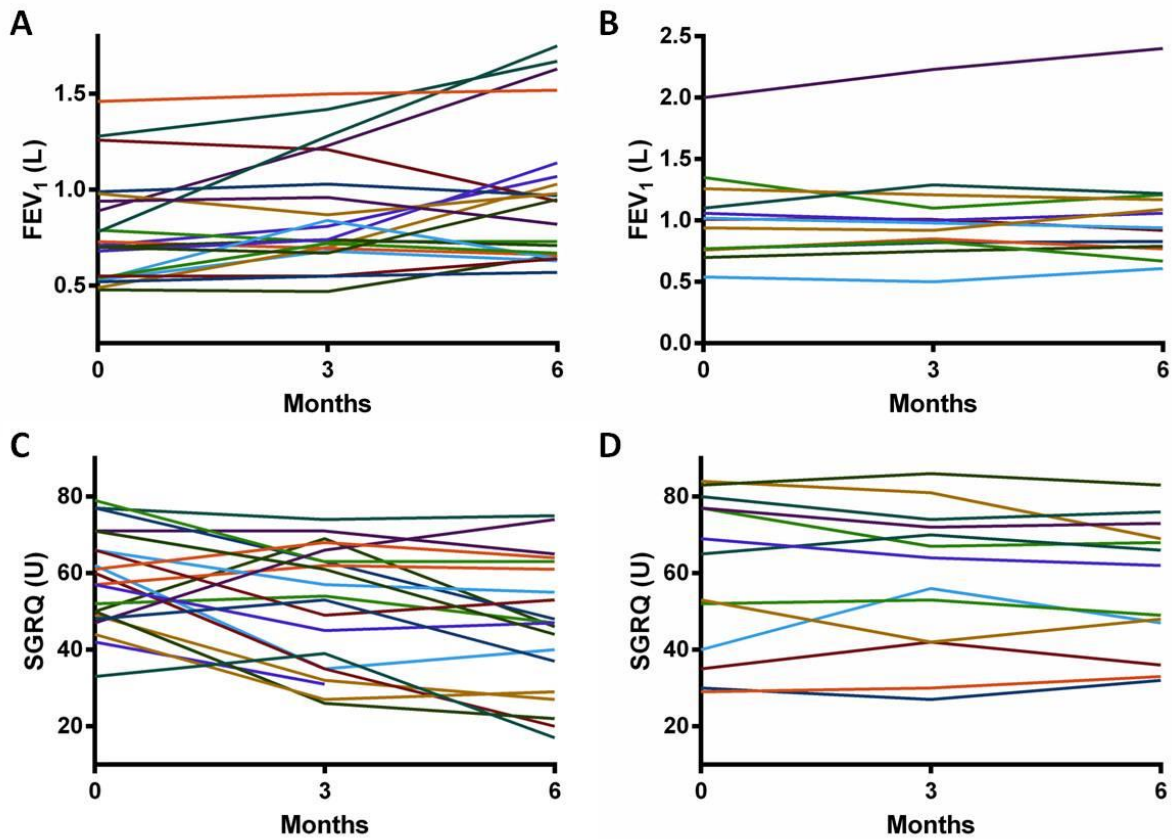

**Figure S1.** Plot of FEV<sub>1</sub> at baseline, three months, and six months for each patient with six month follow-up data for **A)** treated patients and **B)** control patients. Similar plots of SGRQ for **C)** treated patients and **D)** control patients. These data suggest that many treated patients had durable and ongoing improvements in FEV<sub>1</sub> and SGRQ from three to six months. Note, one treated patient was missing 6 month SGRQ data; in the manuscript this patient was not counted as achieving a minimally clinically important difference in SGRQ at 6 months.
